# Supplementary material for: Controlling multiple orderings in metal thiocyanate molecular perovskites A x {Ni[Bi(SCN) 6 ]}
Source: Royal Society of Chemistry journal article supplement (doi:10.1039/d0sc06619b), 2021-01-01
Supplement: d0sc06619b1.pdf [file d0sc06619b1.pdf]

# Controlling multiple orderings in metal thiocyanate molecular perovskites $A\{\text{Ni}[\text{Bi}(\text{SCN})_6]\}$

Jie Yie Lee<sup>1</sup>, Sanliang Ling<sup>2</sup>, Stephen P. Argent<sup>1</sup>, Mark S. Senn<sup>3</sup>, Laura Cañadillas-Delgado<sup>4</sup>, and Matthew J. Cliffe<sup>\*1</sup>

<sup>1</sup>School of Chemistry, University Park, Nottingham, NG7 2RD, United Kingdom

<sup>2</sup>Advanced Materials Research Group, Faculty of Engineering, University of Nottingham, University Park, Nottingham NG7 2RD, United Kingdom

<sup>3</sup>Department of Chemistry, University of Warwick, Gibbet Hill, Coventry CV4 7AL, United Kingdom

<sup>4</sup>Institut Laue Langevin, 71 avenue des Martyrs - CS 20156, 38042 Grenoble, France.

January 7, 2021

## Contents

|                                                                        |           |
|------------------------------------------------------------------------|-----------|
| <b>List of Figures</b>                                                 | <b>1</b>  |
| <b>List of Tables</b>                                                  | <b>2</b>  |
| <b>1 Synthesis</b>                                                     | <b>3</b>  |
| 1.1 Synthesis of $2 K\{\text{Ni}[\text{Bi}(\text{SCN})_6]\}$ . . . . . | 3         |
| <b>2 X-ray Diffraction Measurements</b>                                | <b>3</b>  |
| 2.1 Single Crystal X-ray Diffraction . . . . .                         | 3         |
| 2.2 Single Crystal Neutron Diffraction . . . . .                       | 3         |
| 2.3 Powder X-ray Diffraction . . . . .                                 | 5         |
| <b>3 Tolerance Factor Calculations</b>                                 | <b>10</b> |
| <b>4 Density Functional Theory Calculations</b>                        | <b>10</b> |

## List of Figures

|                                                                                           |   |
|-------------------------------------------------------------------------------------------|---|
| 1 Gua(SCN) viewed along $b$ . . . . .                                                     | 6 |
| 2 Diffuse scattering in <b>4</b> with symmetry averaging applied ( $m\bar{3}$ ) . . . . . | 6 |

---

\*matthew.cliffe@nottingham.ac.uk

|   |                                                                                                                                                                                                                                                                                                                                                                                                                                                                 |    |
|---|-----------------------------------------------------------------------------------------------------------------------------------------------------------------------------------------------------------------------------------------------------------------------------------------------------------------------------------------------------------------------------------------------------------------------------------------------------------------|----|
| 3 | Rietveld fit of synchrotron powder X-ray diffraction data of compound <b>3</b> . The calculated pattern is shown in light blue, the experimental data in dark blue and the difference in grey. . . . .                                                                                                                                                                                                                                                          | 7  |
| 4 | Rietveld fit of synchrotron powder X-ray diffraction data of compound <b>3</b> , zoomed in on low $Q$ region. The calculated pattern is shown in light blue, the experimental data in dark blue and the difference in grey. . . . .                                                                                                                                                                                                                             | 7  |
| 5 | Rietveld fit of laboratory powder X-ray diffraction data of compound <b>2</b> . The calculated pattern is shown in light red, the experimental data in dark red and the difference in grey. . . . .                                                                                                                                                                                                                                                             | 8  |
| 6 | Rietveld fit of laboratory powder X-ray diffraction data of compound <b>4</b> . The calculated pattern is shown in light green, the experimental data in dark green and the difference in grey. . . . .                                                                                                                                                                                                                                                         | 8  |
| 7 | DFT optimised models of orderings in <b>2</b> viewed along the $c$ axis . . . . .                                                                                                                                                                                                                                                                                                                                                                               | 12 |
| 8 | Symmetry analysis of the resulting spacegroup derived from the combination of conventional octahedral tilts with a complex conventional tilt with periodicity of four ( $[\frac{1}{2}\frac{1}{2}\frac{1}{4}]T_2$ irrep) along a single axis in the presence of rocksalt M site order ( $R_2^+$ irrep.). Structures with two tilts, which are not feasible in NCS-perovskites have a grey background. Non-centrosymmetric spacegroups are shown in bold. . . . . | 12 |
| 9 | Venn diagram showing the secondary order parameters deriving from the given modes in the $P\bar{4}2c$ structure. Note that Jahn-Teller distortions on alternating M-sites ( $R_3^-$ irrep) could stabilise the desired complex $T_2$ tilt in the presence of rocksalt M-site order. . .                                                                                                                                                                         | 13 |

## List of Tables

|   |                                                                                                                                                                 |    |
|---|-----------------------------------------------------------------------------------------------------------------------------------------------------------------|----|
| 1 | Single crystal experimental details for compounds <b>1</b> and <b>2</b> . . . . .                                                                               | 4  |
| 2 | Single crystal experimental details for compounds <b>3</b> , <b>4</b> and Gua(SCN) . . . . .                                                                    | 5  |
| 3 | Rietveld refinement fit metrics for <b>3</b> refined using the SCXD model against synchrotron powder X-ray diffraction data . . . . .                           | 9  |
| 4 | DFT-optimised unit cell parameters for models of compound <b>2</b> with seven different $K^+$ orderings, and the DFT-optimised experimental structure . . . . . | 11 |
| 5 | DFT derived energy for compound <b>3</b> for the SCXD derived model and models with inverted $MeNH_3^+$ cations . . . . .                                       | 11 |

# 1 Synthesis

## 1.1 Synthesis of $2 \text{ K}\{\text{Ni}[\text{Bi}(\text{SCN})_6]\}$

KSCN (6 mmol, 0.583 g) was added to a stirred suspension of  $\text{Bi}(\text{NO}_3)_3 \cdot 5 \text{H}_2\text{O}$  (1 mmol, 0.485 g) in 10 mL of butanone, producing a yellow-orange solution and a white precipitate of  $\text{KNO}_3$ .  $\text{Ni}(\text{NO}_3)_2 \cdot 6\text{H}_2\text{O}$  (1 mmol, 0.290 g), was then added producing a dark green solution. The reaction mixture was stirred for overnight and then filtered to remove  $\text{KNO}_3$ , yielding a dark green solution of  $\text{KNi}[\text{Bi}(\text{SCN})_6]$ . This solution was then left to slowly evaporate on a covered watchglass, yield dark red single crystals of  $\text{KNi}[\text{Bi}(\text{SCN})_6]$ .

Compounds **1**, **3** and **4** were synthesised using an analogous routes, where KSCN was substituted for the appropriate thiocyanate salt.

## 2 X-ray Diffraction Measurements

### 2.1 Single Crystal X-ray Diffraction

Single crystals were selected and mounted using perfluoropolyether oil on a polymer-tipped MiTeGen MicroMount<sup>TM</sup> and cooled rapidly to 120 K or 180 K in a stream of cold  $\text{N}_2$  using an Oxford Cryosystems open flow cryostat.<sup>1</sup> Single crystal X-ray diffraction data were collected for compound **1** using a Nonius KappaCCD diffractometer, using graphite monochromated  $\text{MoK}\alpha$  radiation ( $\lambda = 0.7107 \text{ \AA}$ ) at 180 K. Data for compound **2** were collected on an Oxford Diffraction GV1000 (TitanS2 CCD area detector, mirror-monochromated  $\text{Cu-K}\alpha$  radiation source;  $\lambda = 1.54184 \text{ \AA}$ ,  $\omega$  scans) at 120 K. Data for compound **3** were collected on an Oxford Diffraction GV1000 (AtlasS2 CCD area detector, mirror-monochromated  $\text{Cu-K}\alpha$  radiation source;  $\lambda = 1.54184 \text{ \AA}$ ,  $\omega$  scans) at 120 K. Data for compound **4** were collected in Experiments Hutch 1 (EH1) of Beamline I19, at Diamond Light Source.<sup>2</sup> The data were collected at a wavelength of  $0.6889 \text{ \AA}$  on a Fluid Film Devices 3-circle fixed-chi diffractometer using a Dectris Pilatus 2M detector. Data for  $\text{Gua}(\text{SCN})$  were collected on an Oxford Diffraction SuperNova Duo diffractometer (Atlas CCD area detector, mirror-monochromated  $\text{Cu-K}\alpha$  radiation source;  $\lambda = 1.54184 \text{ \AA}$ ,  $\omega$  scans).

Cell parameters were refined from the observed positions of all strong reflections. Integration and absorption corrections were carried out for laboratory data using a Gaussian numerical method with beam profile correction (CrysAlisPro)<sup>3</sup> and for synchrotron data using the xia2<sup>4</sup> and DIALS software packages<sup>5</sup>. Structures were solved within Olex2<sup>6</sup> by dual space iterative methods (SHELXT)<sup>7</sup> and all non-hydrogen atoms refined by full-matrix least-squares on all unique  $F^2$  values with anisotropic displacement parameters (SHELXL).<sup>8</sup> Hydrogen atoms in compound **2** and in  $\text{Gua}(\text{SCN})$  were located in the difference map and refined with constrained geometries and riding thermal parameters. H atoms could not be reliably located or positioned in compounds **3** and **4** due to structural disorder and so were omitted. Structures were checked with checkCIF (<https://checkcif.iucr.org/>). CCDC-2045274-8 contain the supplementary data for these compounds. These data can be obtained free of charge from The Cambridge Crystallographic Data Centre via [www.ccdc.cam.ac.uk/data\\_request/cif](http://www.ccdc.cam.ac.uk/data_request/cif).

### 2.2 Single Crystal Neutron Diffraction

Monochromatic single crystal diffraction data were collected on the four-circle D19 diffractometer at ILL (Grenoble, France) with  $\text{Cu } 331$  monochromated radiation (take-off angle  $2\theta_M = 69.9^\circ$ ), providing neutrons with a wavelength of  $0.94558 \text{ \AA}$ , which is a good compromise between instrumental resolution, data completeness and the overlapping of neighbouring reflections. The sample was placed in a closed-circuit displax cooling device, which was operated following a ramp of  $2 \text{ K min}^{-1}$ . The measurement strategy consisted of several  $\omega$  scans (25 at 20 K and 13 at 260 K) with steps of  $0.07^\circ$  at different  $\chi$  and  $\phi$  positions. Unit-cell determinations were performed using PFIND and DIRAX programs, and processing of the raw data was applied using RETREAT and RAFD19 programs.<sup>9-11</sup> Structures were refined within Olex2<sup>6</sup> using SHELXL<sup>8</sup>. All atoms were refined by full-matrix least-squares on all unique  $F^2$  values with anisotropic displacement parameters. CCDC-2045258-9 con-

tain the supplementary data for these compounds. These data can be obtained free of charge from The Cambridge Crystallographic Data Centre via [www.ccdc.cam.ac.uk/data\\_request/cif](http://www.ccdc.cam.ac.uk/data_request/cif).

Table 1: Single crystal experimental details for compounds **1** and **2**

|                                                          | <b>1</b> 20N          | <b>1</b> 120X            | <b>1</b> 260N         | <b>2</b>               |
|----------------------------------------------------------|-----------------------|--------------------------|-----------------------|------------------------|
| Empirical formula                                        | C6 H4 Bi1 N4<br>N1 S3 | C6 H4 Bi1 N4 N1<br>S3    | C6 H4 Bi1 N4<br>N1 S3 | C6 Bi1 K1 N6<br>Ni1 S6 |
| Formula weight (Da)                                      | 634.21                | 634.21                   | 634.21                | 655.27                 |
| <i>T</i> (K)                                             | 20                    | 120                      | 260                   | 180                    |
| $\lambda$ (Å)                                            | 0.94558               | 1.54184                  | 0.94558               | 0.71073                |
| Radiation                                                | Neutron               | Cu K $\alpha$            | Neutron               | MoK $\alpha$           |
| Crystal system                                           | Triclinic             | Triclinic                | Triclinic             | Triclinic              |
| Space group                                              | $P\bar{1}$            | $P\bar{1}$               | $P\bar{1}$            | $P\bar{1}$             |
| <i>a</i> (Å)                                             | 8.44100(10)           | 8.4699(2)                | 8.4472(12)            | 8.5073(2)              |
| <i>b</i> (Å)                                             | 8.68990(10)           | 8.6913(2)                | 8.7119(10)            | 8.5686(2)              |
| <i>c</i> (Å)                                             | 11.8177(2)            | 11.9058(3)               | 11.9671(9)            | 11.9651(3)             |
| $\alpha^\circ$                                           | 97.5740(10)           | 97.187(2)                | 97.041(6)             | 97.5730(10)            |
| $\beta^\circ$                                            | 92.1370(10)           | 91.149(2)                | 90.364(7)             | 89.7810(10)            |
| $\gamma^\circ$                                           | 91.8170(10)           | 91.610(2)                | 91.558(9)             | 90.9970(10)            |
| <i>V</i> (Å <sup>3</sup> )                               | 858.10(2)             | 868.96(4)                | 873.67(17)            | 864.46(4)              |
| <i>Z</i>                                                 | 2                     | 2                        | 2                     | 2                      |
| $\rho_{\text{calc}}$ (g cm <sup>-3</sup> )               | 2.455                 | 2.424                    | 2.411                 | 2.517                  |
| $\mu$ (mm <sup>-1</sup> )                                | 0.04734               | 27.765                   | 0.04734               | 12.215                 |
| <i>F</i> (000)                                           | 592                   | 592                      | 592                   | 608                    |
| Crystal size (mm)                                        | 2.9 × 2.5 ×<br>2.2    | 0.247 × 0.241 ×<br>0.087 | 2.9 × 2.5 ×<br>2.2    | 0.06 × 0.05 ×<br>0.02  |
| $\theta$ range (°)                                       | 4.585–60.791          | 3.743–73.681             | 4.552–60.723          | 1.717–27.508           |
| Reflections                                              | 18745                 | 15829                    | 9536                  | 7203                   |
| Measured                                                 |                       |                          |                       |                        |
| Independent                                              | 9590                  | 3468                     | 6293                  | 3926                   |
| Reflections                                              |                       |                          |                       |                        |
| Completeness / max<br>$\theta$ (°)                       | 0.848 / 60.791        | 0.988 / 73.681           | 0.548 / 60.723        | 0.992 / 27.508         |
| Absorption<br>correction                                 | empirical             | gaussian                 | empirical             | multi-scan             |
| Transmission max. /<br>min.                              | 0.9203/0.8824         | 0.591/0.101              | 0.9203/0.8824         | 1.0 / 0.83             |
| Refinement Method                                        | $F^2$                 | $F^2$                    | $F^2$                 | $F^2$                  |
| Data/<br>restraints/parameters                           | 9590/ 0/ 232          | 3468 / 10 / 212          | 6293 / 0 / 233        | 7203 / 0 / 196         |
| Goodness-of-fit on<br>$F^2$                              | 1.151                 | 1.096                    | 1.266                 | 1.075                  |
| Final $R(F)$ ( $I > 2\sigma$ )                           | 0.0448                | 0.0228                   | 0.0963                | 0.0568                 |
| $wR2(F^2)$ (all data)                                    | 0.1117                | 0.0652                   | 0.3111                | 0.1452                 |
| Max diff. peak/hole<br>(e <sup>-</sup> /Å <sup>3</sup> ) | +1.227 /<br>-1.752    | +1.621 / -1.218          | +2.564 /<br>-2.165    | +3.567/-3.225          |
| CCDC code                                                | 2045258               | 2045274                  | 2045259               | 2045276                |

Table 2: Single crystal experimental details for compounds **3**, **4** and Gua(SCN)

|                                                          | <b>3</b>                 | <b>4</b>                           | Gua(SCN)                 |
|----------------------------------------------------------|--------------------------|------------------------------------|--------------------------|
| Empirical formula                                        | C7 Bi1 N7 Ni1 S6         | C0.92 Bi0.15 N1.25<br>Ni0.17 S0.86 | C2 H6 N4 S               |
| Formula weight (Da)                                      | 642.19                   | 97.32                              | 118.17                   |
| $T$ (K)                                                  | 120                      | 100                                | 120                      |
| $\lambda$ (Å)                                            | 1.54184                  | 0.6889                             | 1.54184                  |
| Radiation                                                | Cu $K\alpha$             | Synchrotron X-ray                  | Cu $K\alpha$             |
| Crystal system                                           | Monoclinic               | Cubic                              | Triclinic                |
| Space group                                              | $P1\frac{2}{n}1$         | $Pn\bar{3}$                        | $P\bar{1}$               |
| $a$ (Å)                                                  | 12.21600(10)             | 12.12528(2)                        | 6.9352(6)                |
| $b$ (Å)                                                  | 36.8375(4)               | 12.12528(2)                        | 7.0096(5)                |
| $c$ (Å)                                                  | 24.5263(3)               | 12.12528(2)                        | 12.3675(7)               |
| $\alpha$ °                                               | 90                       | 90                                 | 90.894(5)                |
| $\beta$ °                                                | 90.2240(10)              | 90                                 | 104.311(7)               |
| $\gamma$ °                                               | 90                       | 90                                 | 101.787(7)               |
| $V$ (Å <sup>3</sup> )                                    | 11036.9(2)               | 1782.689(10)                       | 568.89(7)                |
| $Z$                                                      | 24                       | 24                                 | 4                        |
| $\rho_{\text{calc}}$ (g cm <sup>-3</sup> )               | 2.319                    | 2.176                              | 1.38                     |
| $\mu$ mm <sup>-1</sup>                                   | 26.251                   | 9.725                              | 4.11                     |
| $F(000)$                                                 | 7152                     | 1084                               | 248                      |
| Crystal size (mm)                                        | 0.065 × 0.057 ×<br>0.022 | 0.09 × 0.06 × 0.02                 | 0.206 × 0.115 ×<br>0.047 |
| $\theta$ range (°)                                       | 3.600–67.684             | 2.302–35.897                       | 3.697–73.681             |
| Reflections Measured                                     | 123648                   | 36116                              | 2392                     |
| Independent Reflections                                  | 21661                    | 1524                               | 2256                     |
| Completeness / max $\theta$ (°)                          | 0.982 / 67.684           | 0.979 / 35.897                     | 0.982 / 73.681           |
| Absorption correction                                    | gaussian                 | empirical                          | gaussian                 |
| Transmission max. / min.                                 | 1.0 / 0.937              | 1.0 / 0.9719                       | 1.00 / 0.854             |
| Refinement Method                                        | $F^2$                    | $F^2$                              | $F^2$                    |
| Data/<br>restraints/parameters                           | 21661 / 0 / 1272         | 1524 / 0 / 45                      | 2256 / 0 / 127           |
| Goodness-of-fit on $F^2$                                 | 1.114                    | 1.043                              | 1.126                    |
| Final $R(F)$ ( $I > 2\sigma$ )                           | 0.0422                   | 0.0263                             | 0.0898                   |
| $wR2(F^2)$ (all data)                                    | 0.0962                   | 0.0866                             | 0.2627                   |
| Max diff. peak/hole<br>(e <sup>-</sup> /Å <sup>3</sup> ) | +1.510/-1.895            | +0.619/-0.507                      | +0.905/-0.539            |
| CCDC code                                                | 2045278                  | 2045277                            | 2045275                  |

### 2.3 Powder X-ray Diffraction

A high-resolution synchrotron X-ray powder diffraction measurement of **3**,  $\text{MeNH}_3\{\text{Ni}[\text{Bi}(\text{SCN})_6]\}$ , was carried out at beamline I11 at the Diamond Light Source (APS) using a wavelength of 0.82659 Å. The sample was loaded into a 0.5 mm diameter glass capillary. Rietveld refinement of the data was carried out using Topas Academic 6.<sup>12,13</sup> Lattice parameters were allowed to refine freely, along with the crystallographic size and strain. Atomic coordinates and atomic displacement parameters were fixed to those determined from single-crystal diffraction. H-atoms were omitted. The superlattice reflections are weak because they are primarily due to the light atoms in the frameworks ( $\text{MeNH}^+$ ,  $\text{NCS}^-$ ) rather than the heavy metal atoms. Refinement statistics are included in Tbl. 3. Laboratory powder X-ray diffraction measurements of **2**,  $\text{K}\{\text{Ni}[\text{Bi}(\text{SCN})_6]\}$ , and **4**,  $\text{Gua}_3\{\text{Ni}_6[\text{Bi}(\text{SCN})_6]_5\}$ , were carried out using a Panalytical Empyrean diffractometer using  $\text{CuK}\alpha 1$  radiation  $\lambda = 1.540562$  (**2**),

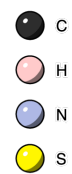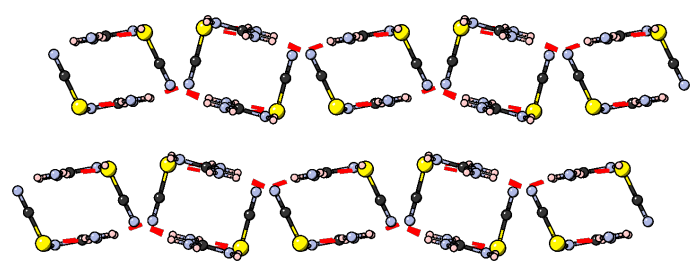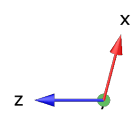

Figure 1: Gua(SCN) viewed along  $b$

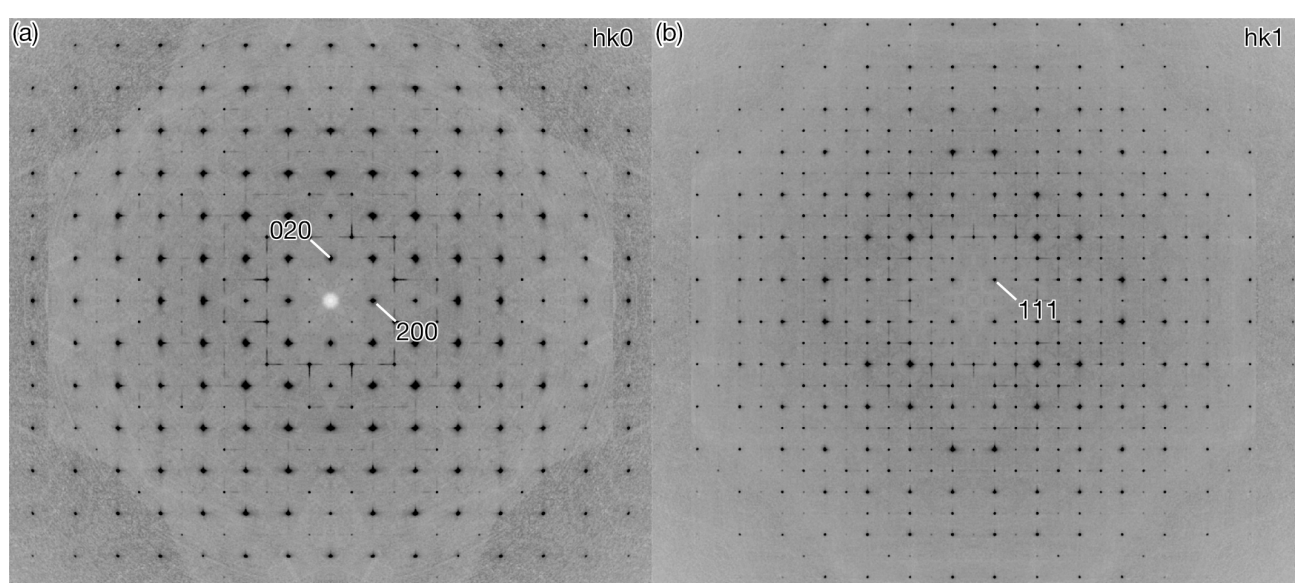

Figure 2: Diffuse scattering in **4** with symmetry averaging applied ( $m\bar{3}$ )

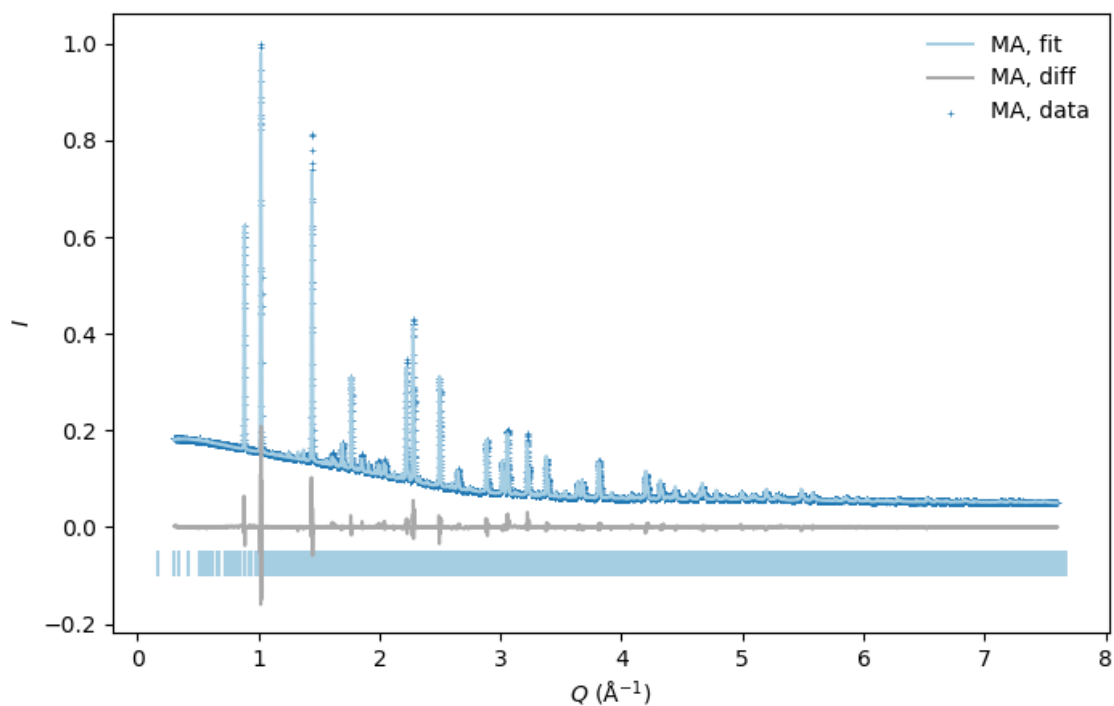

Figure 3: Rietveld fit of synchrotron powder X-ray diffraction data of compound **3**. The calculated pattern is shown in light blue, the experimental data in dark blue and the difference in grey.

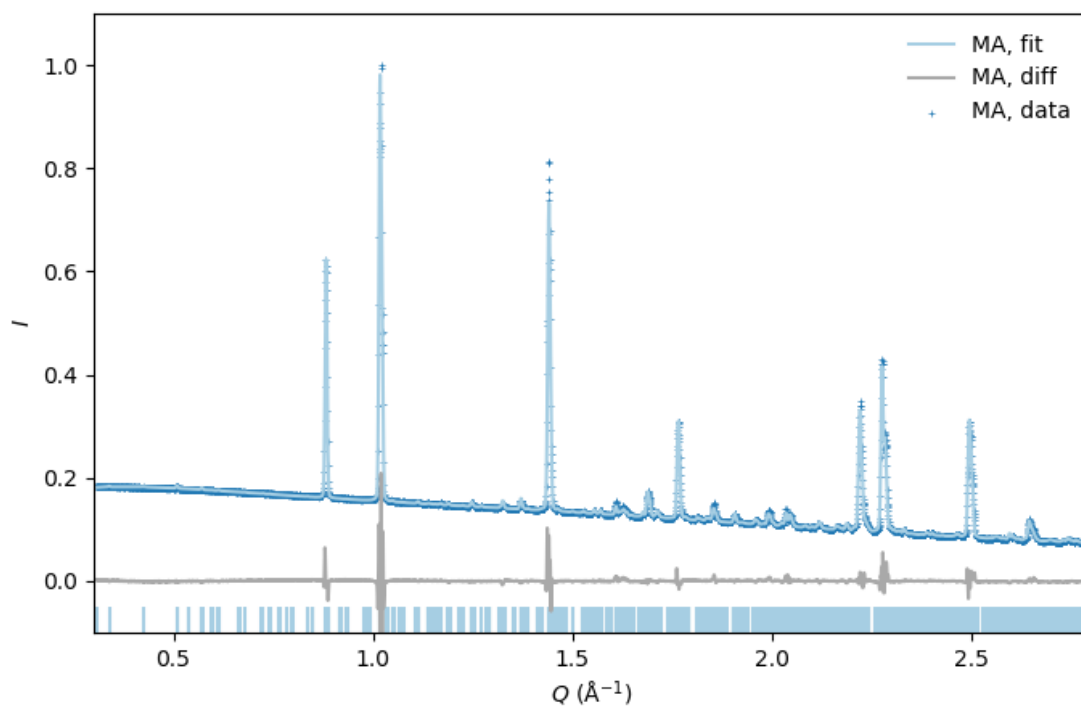

Figure 4: Rietveld fit of synchrotron powder X-ray diffraction data of compound **3**, zoomed in on low  $Q$  region. The calculated pattern is shown in light blue, the experimental data in dark blue and the difference in grey.

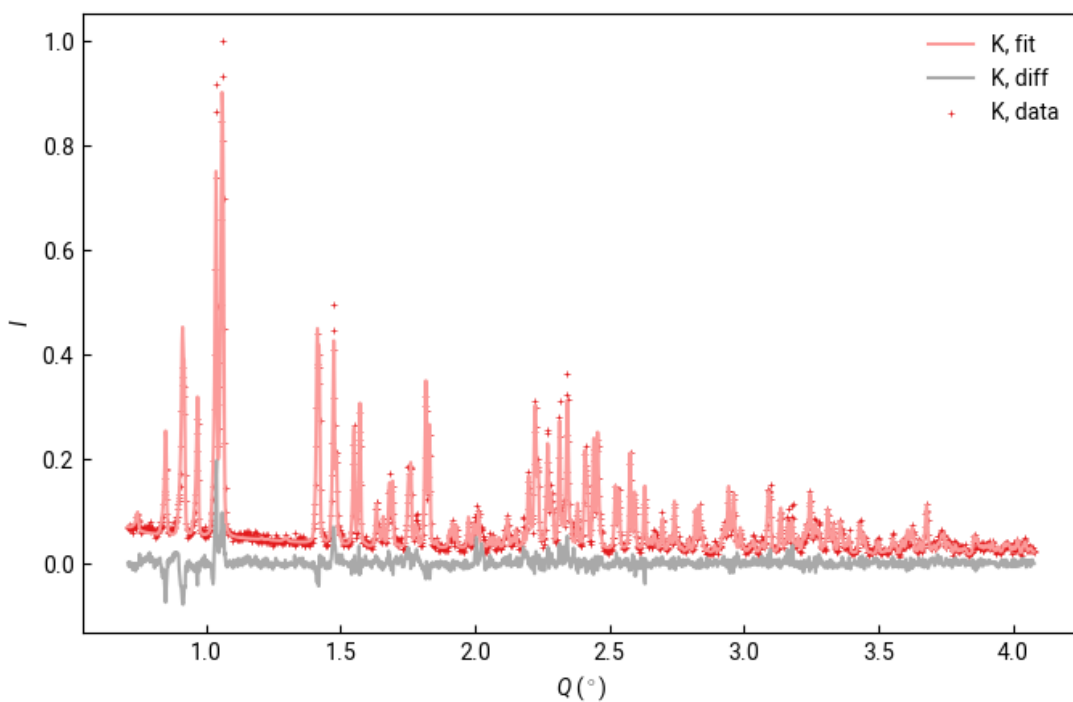

Figure 5: Rietveld fit of laboratory powder X-ray diffraction data of compound **2**. The calculated pattern is shown in light red, the experimental data in dark red and the difference in grey.

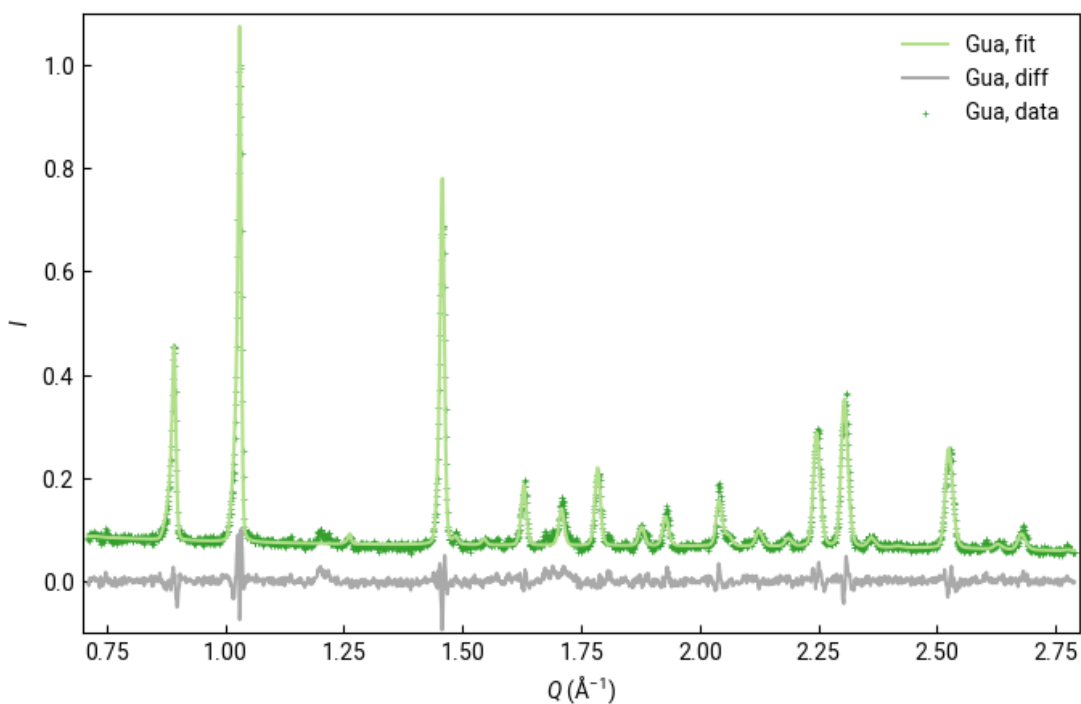

Figure 6: Rietveld fit of laboratory powder X-ray diffraction data of compound **4**. The calculated pattern is shown in light green, the experimental data in dark green and the difference in grey.



CuK $\alpha$  radiation  $\lambda = 1.5420$  (4), in flat plate geometry. Rietveld refinement of the data was carried out using Topas Academic 6.<sup>12,13</sup> Lattice parameters were allowed to refine freely, along with the crystallographic size and strain. Atomic coordinates and atomic displacement parameters were fixed to those determined from single-crystal diffraction. H-atoms were omitted.

Table 3: Rietveld refinement fit metrics for **3** refined using the SCXD model against synchrotron powder X-ray diffraction data

|             |       |
|-------------|-------|
| $R_{wp}$    | 2.976 |
| $R_p$       | 1.438 |
| $R_{Bragg}$ | 2.080 |
| $S$         | 9.648 |

### 3 Tolerance Factor Calculations

The tolerance factor for atomic frameworks is defined as  $\tau = \frac{r_A+r_X}{\sqrt{2}(r_M+r_x)}$ , where  $r_A$  is the radius of the A-site cation,  $r_M$  the radius of the M-site cation,  $r_x$  is the radius of the X-site anion. In molecular frameworks, an effective radius can be defined for (alkyl)ammonium cations, but the extended nature of anions means they are often better modelled by a cylinder, as proposed by Kieslich, Sun and Cheetham (KSC).<sup>14</sup> Each anion therefore has two, a radius and a length:

$$\tau = \frac{r_A+r_X}{\sqrt{2}(r_M+\frac{l_x}{2})},$$

where  $r_A$  is the effective radius of the A-site cation,  $r_M$  the radius of the M-site cation,  $r_x$  is the effective radius of the X-site anion, and  $l_x$  the effective length of the X-site anion. Using the library of existing NCS-perovskites we estimated the effective parameters of the  $\text{NCS}^-$  ligands to be  $r_{\text{NCS}} = 2.00 \text{ \AA}$ ,  $l_{\text{NCS}} = 4.34 \text{ \AA}$ , comparable to previous estimates of spherical radii for  $\text{NCS}^-$ .<sup>15</sup> We used radii derived by Shannon for atomic cations,<sup>16</sup> and those derived by KSC for molecular cations.<sup>14</sup> For mixed cation perovskites the mean of the two radii was used to calculate  $\tau$ .

### 4 Density Functional Theory Calculations

We performed density functional theory (DFT) calculations to probe the structures and energetics of several compounds considered in this study.

For compounds **2** and **3**, cell optimizations were performed using the CP2K code (version 6.0), which uses a mixed Gaussian/plane-wave basis set.<sup>17,18</sup> We employed double- $\zeta$  polarization quality Gaussian basis sets<sup>19</sup> and a 400 Ry plane-wave cutoff for the auxiliary grid, in conjunction with the Goedecker-Teter-Hutter pseudopotentials<sup>20,21</sup>. A convergence threshold of  $1.0 \times 10^{-6}$  Hartree was used for the self-consistent field cycle; cell optimizations (including cell parameters and atomic positions) were considered to be converged when the maximum force on atoms fell below  $4.5 \times 10^{-4}$  Hartree/Bohr. Spin-polarization was needed to describe open-shell  $\text{Ni}^{2+}$  cations, and we assume a high-spin ferromagnetic solution for all  $\text{Ni}^{2+}$  cations in our calculations. All DFT calculations were performed in the  $\Gamma$ -point approximation, using the PBE functional,<sup>22</sup> with Grimme's D3 van der Waals correction (PBE+D3)<sup>23</sup>.

For  $\text{Cs}_3\{\text{Fe}[\text{Bi}(\text{SCN})_6]\}_4$  a spin-polarized DFT+ $U$  method (with Grimme's D3 van der Waals correction<sup>23</sup>) was employed to describe better the two different oxidation states of Fe in this compound ( $\text{Fe}^{2+}$  and  $\text{Fe}^{3+}$ , using the Vienna Ab initio Simulation Package (VASP 5.4.4)<sup>24</sup>. In our DFT+ $U$  calculations, we used  $U = 3.0$  eV for the d-electrons of  $\text{Fe}^{2+}$  cations and  $U = 6.0$  eV for the d-electrons of  $\text{Fe}^{3+}$  cations and a high-spin ferromagnetic solution was assumed for all  $\text{Fe}^{2+}$  and  $\text{Fe}^{3+}$  cations. We used a plane-wave basis set with a kinetic energy cutoff of 400 eV to expand the wave functions. The Perdew-Burke-Ernzerhof functional<sup>22</sup> in combination with the projector augmented wave method<sup>25,26</sup> were used to solve the Kohn-Sham equations. An energy convergence threshold of  $10^{-4}$  eV was used for all total energy calculations. Structural optimizations, which included optimisation of cell parameters and atomic positions, were considered converged once all interatomic forces fell below 0.02 eV/Å. All DFT calculations were performed in the  $\Gamma$ -point approximation for sufficiently large cells.

Starting configurations for investigating the different orderings of  $\text{K}\{\text{Ni}[\text{Bi}(\text{SCN})_6]\}$  were created by first generating a  $(\sqrt{2} \times \sqrt{2} \times 1)$  supercell of the experimental  $\text{Fe}[\text{Bi}(\text{SCN})_6]$  structure, and then placing four  $\text{K}^+$  cations into the centre of the pseudocubic cages with each of the different orderings. The close similarity between the optimised structure with columnar [001] A-site order generated with this method and the experimental structure therefore shows the reliability of this approach. The anisotropy of the structures was assessed by calculating the strain relative to a hypothetical cubic cell, where  $\alpha = \beta = \gamma = 90^\circ$  and  $a_{\text{cubic}} = V^{\frac{1}{3}}$ . The principal strains (eigenvalues of the strain matrix) are reported in Tbl. 4.<sup>27</sup>

Table 4: DFT-optimised unit cell parameters for models of compound **2** with seven different K<sup>+</sup> orderings, and the DFT-optimised experimental structure

| Model       | <i>a</i> (Å) | <i>b</i> (Å) | <i>c</i> (Å) | $\alpha$ (°) | $\beta$ (°) | $\gamma$ (°) | <i>V</i> (Å <sup>3</sup> ) | $a_{\text{cubic}}$ (Å) | strain | (%)   |      |
|-------------|--------------|--------------|--------------|--------------|-------------|--------------|----------------------------|------------------------|--------|-------|------|
| Expt.       | 12.3746      | 12.1038      | 12.0364      | 96.612       | 84.369      | 91.234       | 1782.08                    | 12.1239                | 7.75   | -0.01 | 7.77 |
| Rocksalt    | 12.2034      | 12.2035      | 12.1930      | 89.579       | 89.582      | 88.184       | 1814.83                    | 12.1977                | -1.56  | -0.19 | 1.75 |
| Layer (100) | 12.1448      | 12.2389      | 12.2354      | 90.465       | 89.405      | 87.855       | 1817.22                    | 12.2031                | -2.22  | 0.44  | 1.78 |
| Layer (010) | 12.2408      | 12.1385      | 12.2388      | 89.418       | 90.469      | 87.801       | 1817.00                    | 12.2026                | -2.28  | 0.46  | 1.82 |
| Layer (001) | 12.2015      | 12.2018      | 12.3409      | 89.710       | 89.712      | 86.469       | 1833.79                    | 12.2400                | -3.48  | 0.76  | 2.73 |
| Col [100]   | 12.2118      | 12.0950      | 12.2594      | 89.835       | 89.768      | 86.343       | 1807.03                    | 12.1802                | -3.54  | 0.62  | 2.92 |
| Col [010]   | 12.0944      | 12.2112      | 12.2596      | 89.765       | 89.839      | 86.339       | 1806.87                    | 12.1799                | -3.55  | 0.63  | 2.92 |
| Col [100]   | 12.0988      | 12.2700      | 12.1455      | 94.831       | 84.598      | 89.948       | 1788.57                    | 12.1386                | -6.62  | 0.48  | 6.14 |

Table 5: DFT derived energy for compound **3** for the SCXD derived model and models with inverted MeNH<sub>3</sub><sup>+</sup> cations

| Config. | $E_{\text{total}}$ (Hartree) | $\Delta E$ (kJ/mol per cell) | $n(\text{MeNH}_3^+)$ | $\Delta E$ (kJ/mol per MeNH <sub>3</sub> <sup>+</sup> ) |
|---------|------------------------------|------------------------------|----------------------|---------------------------------------------------------|
| Expt.   | -8378.72661                  | 0.0                          | -                    | 0.0                                                     |
| MA-1    | -8378.714436                 | 32.0                         | 2                    | 16.0                                                    |
| MA-2    | -8378.718684                 | 20.8                         | 2                    | 10.4                                                    |
| MA-3    | -8378.697917                 | 75.3                         | 4                    | 18.8                                                    |
| MA-4    | -8378.718645                 | 20.9                         | 2                    | 10.5                                                    |
| MA-5    | -8378.700874                 | 67.6                         | 4                    | 16.9                                                    |
| MA-6    | -8378.714088                 | 32.9                         | 2                    | 16.4                                                    |
| MA-7    | -8378.7094                   | 45.2                         | 4                    | 11.3                                                    |
| MA-8    | -8378.692082                 | 90.7                         | 4                    | 22.7                                                    |

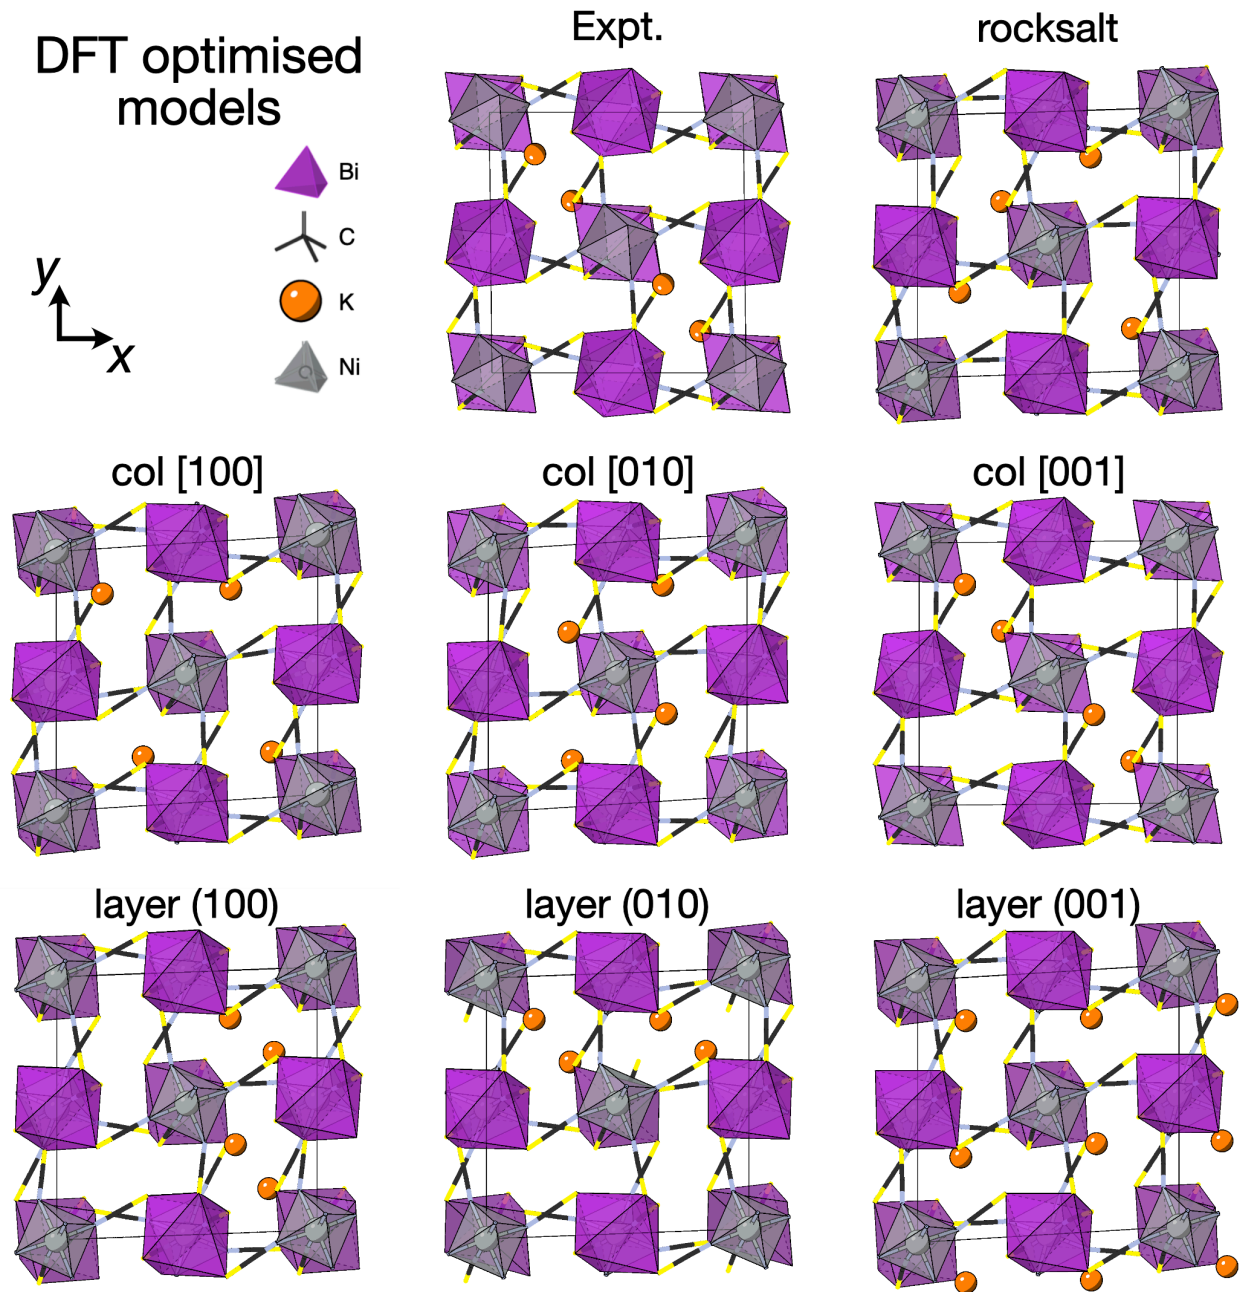

Figure 7: DFT optimised models of orderings in **2** viewed along the *c* axis

|                | $T_2(a,0;0,0;0,0)$      | $T_2(a,a;0,0;0,0)$ |
|----------------|-------------------------|--------------------|
| $M_2^+(0;0;a)$ | <i>Pban</i>             | <i>Pnna</i>        |
| $M_2^+(0;a;a)$ | <b><i>P42c</i></b>      | <i>Ccca</i>        |
| $R_5^-(0,0,a)$ | <i>C2/c</i>             | <i>C2/c</i>        |
| $R_5^-(0,a,a)$ | <i>P2<sub>1</sub>/c</i> | <i>P2/c</i>        |

Figure 8: Symmetry analysis of the resulting spacegroup derived from the combination of conventional octahedral tilts with a complex conventional tilt with periodicity of four ( $[\frac{1}{2}\frac{1}{2}\frac{1}{4}]T_2$  irrep) along a single axis in the presence of rocksalt M site order ( $R_2^+$  irrep.). Structures with two tilts, which are not feasible in NCS-perovskites have a grey background. Non-centrosymmetric spacegroups are shown in bold.

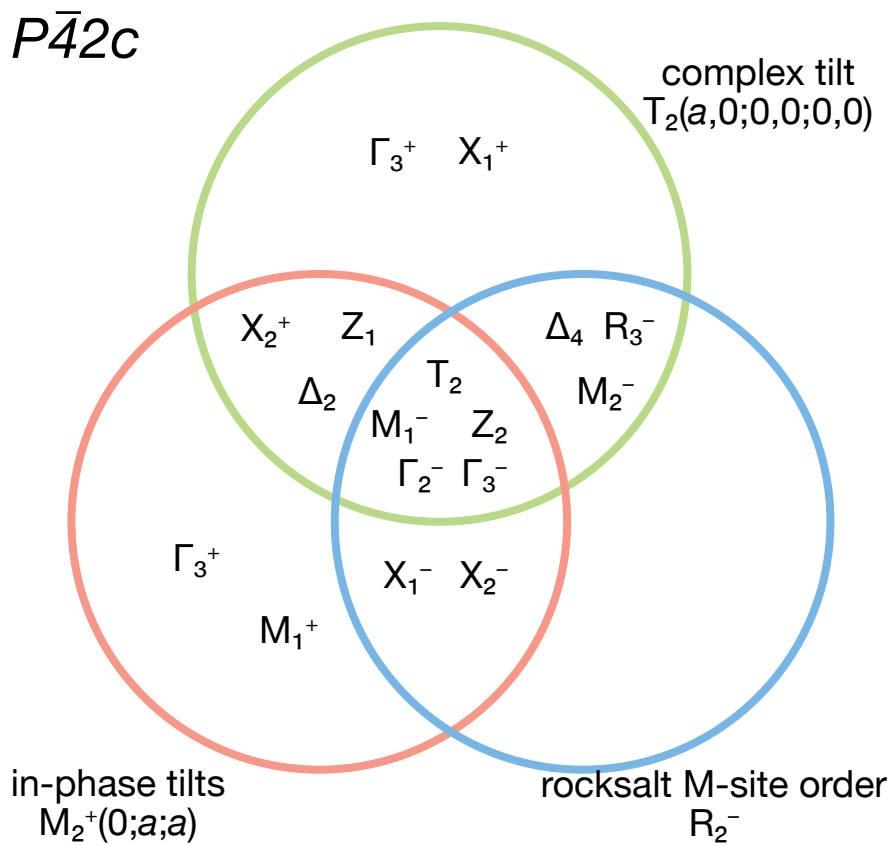

Figure 9: Venn diagram showing the secondary order parameters deriving from the given modes in the  $P\bar{4}2c$  structure. Note that Jahn-Teller distortions on alternating M-sites ( $R_3^-$  irrep) could stabilise the desired complex  $T_2$  tilt in the presence of rocksalt M-site order.

## References

- [1] J. Cosier *et al.*, *J. Appl. Crystallogr.*, 1986, **19**, 105–107.
- [2] D. R. Allan *et al.*, *Crystals*, 2017, **7**, 336.
- [3] *CrysAlisPro Software System, Version 1.171.40.45a*, Rigaku Corporation, 2018.
- [4] G. Winter, *J Appl Cryst*, 2010, **43**, 186–190.
- [5] G. Winter *et al.*, *Acta Cryst D*, 2018, **74**, 85–97.
- [6] O. V. Dolomanov *et al.*, *J. Appl. Crystallogr.*, 2009, **42**, 339–341.
- [7] G. M. Sheldrick, *Acta Crystallogr.*, 2015, **A71**, 3–8.
- [8] G. M. Sheldrick, *Acta Crystallogr.*, 2015, **C71**, 3–8.
- [9] A. J. M. Duisenberg, *J Appl Cryst*, 1992, **25**, 92–96.
- [10] G. J. McIntyre *et al.*, *Acta Cryst A*, 1988, **44**, 257–262.
- [11] C. Wilkinson *et al.*, *J Appl Cryst*, 1988, **21**, 471–478.
- [12] H. Rietveld, *J. Appl. Crystallogr.*, 1969, **2**, 65–71.
- [13] A. A. Coelho *et al.*, *Powder Diffr.*, 2011, **26**, S22–S25.
- [14] G. Kieslich *et al.*, *Chem. Sci.*, 2015, **6**, 3430–3433.
- [15] Y. Iwadate *et al.*, *J. Phys. Chem.*, 1982, **86**, 5205–5208.
- [16] R. D. Shannon, *Acta Cryst*, 1976, **A32**, 751–767.
- [17] J. VandeVondele *et al.*, *Comput. Phys. Commun.*, 2005, **167**, 103–128.
- [18] J. Hutter *et al.*, *WIREs Comput. Mol. Sci.*, 2014, **4**, 15–25.
- [19] J. VandeVondele *et al.*, *J. Chem. Phys.*, 2007, **127**, 114105.
- [20] S. Goedecker *et al.*, *Phys. Rev. B*, 1996, **54**, 1703–1710.
- [21] M. Krack, *Theor Chem Acc*, 2005, **114**, 145–152.
- [22] J. P. Perdew *et al.*, *Phys. Rev. Lett.*, 1996, **77**, 3865–3868.
- [23] S. Grimme *et al.*, *J. Chem. Phys.*, 2010, **132**, 154104.
- [24] G. Kresse *et al.*, *Phys. Rev. B*, 1996, **54**, 11169–11186.
- [25] P. E. Blöchl, *Phys. Rev. B*, 1994, **50**, 17953–17979.
- [26] D. Hobbs *et al.*, *Phys. Rev. B*, 2000, **62**, 11556–11570.
- [27] M. J. Cliffe *et al.*, *J. Appl. Crystallogr.*, 2012, **45**, 1321–1329.
